# Supplementary material for: Promoting Access to Innovative Anticancer Medicines: A Review of Drug Price and National Reimbursement Negotiation in China
Source: PubMed Central journal article supplement — Inquiry. 2023 May 12;60:00469580231170729. doi: 10.1177/00469580231170729 (PMC10184198; doi:10.1177/00469580231170729), 2023-05-12
Supplement: sj-pdf-1-inq-10.1177_00469580231170729.pdf [file sj-pdf-1-inq-10.1177_00469580231170729.pdf]

## Appendix 1.

### PubMed search Strategy

Data last searched: December 27, 2022

60 results

*(((Drug Costs[Mesh]) OR ((Price[Title/Abstract]))) OR (Health Services Accessibility[Mesh])) OR ((affordability[Title/Abstract])) OR ((access[Title/Abstract])) OR ((accessibility[Title/Abstract])) AND (((Negotiating[Mesh]) OR ((negotiation[Title/Abstract]))) OR (Insurance, Health, Reimbursement[Mesh])) OR (Insurance Coverage[Mesh])) OR ((Reimbursement[Title/Abstract])) AND ((((((( Antineoplastic Agents[Mesh]) OR (Cancer Medicine )) OR (Anticancer Medicine )) OR (Targeted Therapy)) OR (Antibodies, Monoclonal[Mesh])) OR (Protein Kinase Inhibitors[Mesh])) OR (Molecular Targeted Therapy[Mesh])) OR (innovative medicine )) OR (patent medicine ))) AND (((China[Title/Abstract])) OR ((Chinese[Title/Abstract]))) OR (China[Mesh]))*

### Relevant Terms

Drug price negotiation / National reimbursement negotiation

- Negotiating[Mesh]
- negotiation[Title/Abstract]
- Insurance, Health, Reimbursement[Mesh]
- Insurance Coverage[Mesh]
- Reimbursement[Title/Abstract]
- Drug Costs[Mesh]
- drug price[Title/Abstract]

Cancer medicine / Anticancer medicine

- Antineoplastic Agents[Mesh]
- Cancer Medicine
- Anticancer Medicine
- Targeted Therapy
- Protein Kinase Inhibitors[Mesh]
- Antibodies, Monoclonal[Mesh]
- Molecular Targeted Therapy[Mesh]
- innovative medicine
- patent medicine

Access/Affordability

- access[Title/Abstract]
- accessibility[Title/Abstract]
- affordability[Title/Abstract]
- Health Services Accessibility[Mesh]

China / Chinese

- China[Mesh]
- China[Title/Abstract]
- Chinese[Title/Abstract]
