# Supplementary material for: Promoting Access to Innovative Anticancer Medicines: A Review of Drug Price and National Reimbursement Negotiation in China
Source: PubMed Central journal article supplement — Inquiry. 2023 May 12;60:00469580231170729. doi: 10.1177/00469580231170729 (PMC10184198; doi:10.1177/00469580231170729), 2023-05-12
Supplement: sj-pdf-2-inq-10.1177_00469580231170729.pdf [file sj-pdf-2-inq-10.1177_00469580231170729.pdf]

## Appendix 2:

Baseline information of the anticancer medicines included in the NRDL by 2016–2021 negotiations

| Generic Name                    | Manufacturer     | Reimbursement indications     |                                                            |
|---------------------------------|------------------|-------------------------------|------------------------------------------------------------|
| 2016                            |                  |                               |                                                            |
| Gefitinib                       | AstraZeneca      | NSCLC                         | Moved into routine list in 2017                            |
| Icotinib                        | Beta Pharma      | NSCLC                         | Moved into routine list in 2017                            |
| 2017                            |                  |                               |                                                            |
| Rituximab                       | Roche            | Lymphoma                      | Moved into routine list in 2019                            |
| Trastuzumab                     | Roche            | Breast Cancer; Gastric Cancer | Re-negotiated in 2019 ✓<br>Moved into routine list in 2021 |
| Bevacizumab                     | Roche            | CRC; NSCLC; HCC *; rGBM *     | Re-negotiated in 2019 ✓<br>Moved into routine list in 2021 |
| Nimotuzumab                     | Biotech          | Nasopharyngeal Carcinoma      | Re-negotiated in 2019 and 2021 ✓                           |
| Erlotinib                       | Roche            | NSCLC                         | Re-negotiated in 2019 ✓<br>Moved into routine list in 2021 |
| Sorafenib                       | Bayer            | HCC; RCC; Thyroid Cancer      | Re-negotiated in 2019 ✓<br>Moved into routine list in 2021 |
| Lapatinib                       | GSK              | Breast Cancer                 | Re-negotiated in 2019 (Failed)                             |
| Apatinib                        | Hengrui Medicine | Gastric Cancer; HCC *         | Re-negotiated in 2019 and 2021 ✓                           |
| Bortezomib                      | Xi'an Janssen    | Multiple Myeloma; MCL         | Moved into routine list in 2019                            |
| Recombinant Human<br>Endostatin | Shandong Simcere | NSCLC                         | Re-negotiated in 2019 and 2021 ✓                           |

|                                             |                        |                                                              |                                                                   |
|---------------------------------------------|------------------------|--------------------------------------------------------------|-------------------------------------------------------------------|
| Chidamide                                   | Chipscreen Biosciences | Peripheral T-cell Lymphoma                                   | Re-negotiated in 2019 and 2021 ✓                                  |
| Abiraterone                                 | Xi'an Janssen          | Prostate Cancer                                              | Moved into routine list in 2019                                   |
| Fulvestrant                                 | AstraZeneca            | Breast Cancer                                                | Re-negotiated in 2019 (Failed)<br>Moved into routine list in 2020 |
| Everolimus                                  | Novartis               | RCC; pNET; TSC-AML;<br>Subependymal giant cell astrocytoma * | Re-negotiated in 2019 and 2021 ✓                                  |
| Lenalidomide                                | Celgene                | Multiple Myeloma                                             | Moved into routine list in 2019                                   |
| Compound Realgar<br>Natural Indigo Tablets※ | Yifan Pharma           | Acute Promyelocytic Leukemia                                 | Re-negotiated in 2019 ✓                                           |
| Shenyi Capsule※                             | Jilin Yatai            | Adjuvant Therapy                                             | Re-negotiated in 2019 ✓                                           |
| Astragalus polysaccharide<br>Injection※     | Tianjin Sainuo         | Adjuvant Therapy                                             | Re-negotiated in 2019 ✓                                           |
| 2018                                        |                        |                                                              |                                                                   |
| Osimertinib                                 | AstraZeneca            | NSCLC                                                        | Re-negotiated in 2020 ✓                                           |
| Ceritinib                                   | Novartis               | NSCLC                                                        | Re-negotiated in 2020 ✓                                           |
| Afatinib                                    | Boehringer Ingelheim   | NSCLC                                                        | Moved into routine list in 2020                                   |
| Crizotinib                                  | Pfizer                 | NSCLC                                                        | Re-negotiated in 2020 ✓                                           |
| Anlotinib                                   | Chiatai Tianqing       | NSCLC; Soft Tissue Sarcoma *                                 | Re-negotiated in 2020 ✓                                           |
| Vemurafenib                                 | Roche                  | Melanoma                                                     | Re-negotiated in 2020 ✓                                           |
| Cetuximab                                   | Merck                  | CRC; Head & Neck Cancer *                                    | Re-negotiated in 2020 and 2021 ✓                                  |
| Regorafenib                                 | Bayer                  | HCC; CRC; GIST                                               | Re-negotiated in 2020 ✓                                           |

|                         |                   |                                                                     |                                 |
|-------------------------|-------------------|---------------------------------------------------------------------|---------------------------------|
| Pazopanib               | Novartis          | RCC                                                                 | Re-negotiated in 2020 ✓         |
| Sunitinib               | Pfizer            | RCC; GIST; pNET                                                     | Moved into routine list in 2020 |
| Axitinib                | Pfizer            | RCC                                                                 | Re-negotiated in 2020 ✓         |
| Octreotide Microspheres | Novartis          | GEP-NET                                                             | Re-negotiated in 2020 ✓         |
| Ibrutinib               | Jassen            | MCL; CLL/SLL                                                        | Re-negotiated in 2020 ✓         |
| Ixazomib                | Takeda            | Multiple Myeloma                                                    | Re-negotiated in 2020 ✓         |
| Nilotinib               | Novartis          | MCL                                                                 | Re-negotiated in 2020 ✓         |
| Azacitidine             | Celgene/BeiGene   | MDS; CMML; AML                                                      | Moved into routine list in 2020 |
| Pegaspargase            | Hengrui Medicine  | Acute Lymphocytic Leukemia                                          | Re-negotiated in 2020 ✓         |
| 2019                    |                   |                                                                     |                                 |
| Alectinib               | Roche             | NSCLC                                                               | Re-negotiated in 2021 ✓         |
| Fruquintinib            | Chi-Med           | CRC                                                                 | Re-negotiated in 2021 ✓         |
| Raltitrexed             | Chiatai Tianqing  | CRC                                                                 | Moved into routine list in 2021 |
| Olaparib                | AstraZeneca       | Ovarian Cancer, Fallopian Tube Cancer;<br>Primary Peritoneal Cancer | Re-negotiated in 2021 ✓         |
| Pyrotinib               | Hengrui Medicine  | Breast Cancer                                                       | Re-negotiated in 2021 ✓         |
| Pertuzumab              | Roche             | Breast Cancer                                                       | Re-negotiated in 2021 ✓         |
| Sintilimab              | Innovent          | Hodgkin's Lymphoma; NSCLC * ; HCC *                                 | Re-negotiated in 2021 ✓         |
| Ruxolitinib             | Novartis          | PMF; PPV-MF; PET-MF                                                 | Re-negotiated in 2021 ✓         |
| Mecapegfilgrastim       | Hengrui Medicine  | Adjuvant therapy                                                    | Re-negotiated in 2021 ✓         |
| Shidaoping San※         | Shanxi IOK Pharma | Esophageal Cancer                                                   | Re-negotiated in 2021 ✓         |
| 2020                    |                   |                                                                     |                                 |

|                                       |                    |                                                                     |                                                      |
|---------------------------------------|--------------------|---------------------------------------------------------------------|------------------------------------------------------|
| Niraparib                             | Zai Lab            | Ovarian Cancer; Fallopian Tube Cancer;<br>Primary Peritoneal Cancer |                                                      |
| Enzalutamide                          | Astellas           | Prostate Cancer                                                     |                                                      |
| Flumatinib                            | Hansoh Pharma      | Myelogenous Leukemia, CML                                           |                                                      |
| Tislelizumab                          | BeiGene            | Hodgkin's Lymphoma, Urothelial Carcinoma;<br>NSCLC * ; HCC *        | Re-negotiated in 2021 ✓                              |
| Almonertinib                          | Hansoh Pharma      | NSCLC                                                               |                                                      |
| Denosumab                             | Amgen              | Giant Cell Tumor of the Bone                                        |                                                      |
| Lenvatinib                            | Eisai              | HCC                                                                 |                                                      |
| Toripalimab                           | Junshi Biosciences | Melanoma; Nasopharyngeal Carcinoma * ;<br>Urothelial Carcinoma *    | Re-negotiated in 2021 ✓                              |
| Camrelizumab                          | Hengrui Medicine   | HCC; NSCLC; Esophagus Cancer; Hodgkin's<br>Lymphoma                 |                                                      |
| Trametinib                            | GSK                | Melanoma                                                            |                                                      |
| Dabrafenib                            | GSK                | Melanoma                                                            |                                                      |
| Inetetamab                            | Sunshine Guojian   | Breast Cancer                                                       |                                                      |
| Zanubrutinib                          | BeiGene            | MCL,CLL/SLL; Waldenstrom's<br>macroglobulinemia *                   | Re-negotiated in 2021 ✓                              |
| Paclitaxel Liposome<br>Injection      | Luye Pharma        | NSCLC; Breast Cancer; Ovarian Cancer                                |                                                      |
| Oxaliplatin and Mannitol<br>Injection |                    | CRC                                                                 | Direct included generic with volume<br>based pricing |

|                                         |                  |                      |                                                   |
|-----------------------------------------|------------------|----------------------|---------------------------------------------------|
| Fulvestrant                             |                  | Breast Cancer        | Direct included generic with volume based pricing |
| Paclitaxel Injection<br>(albumin-bound) |                  | Breast Cancer        | Direct included generic with volume based pricing |
| 2021                                    |                  |                      |                                                   |
| Donafenib                               | Zelgen Biopharma | HCC                  |                                                   |
| Ensartinib                              | Betta Pharma     | NSCLC                |                                                   |
| Furmonertinib                           | Allist           | NSCLC                |                                                   |
| Dacomitinib                             | Pfizer           | NSCLC                |                                                   |
| Orelabrutinib                           | InnoCare         | MCL; CLL/SLL         |                                                   |
| Obinutuzumab                            | Roche            | Follicular Lymphoma  |                                                   |
| Fluzoparib                              | Hengrui Medicine | Ovarian Cancer       |                                                   |
| Pamiparib                               | BeiGene          | Ovarian Cancer       |                                                   |
| Abemaciclib                             | Eli Lilly        | Breast Cancer        |                                                   |
| Eribulin mesylate                       | Eisai            | Breast Cancer        |                                                   |
| Neratinib                               | CANbridge        | Breast Cancer        |                                                   |
| Sulfatinib                              | Chi-Med          | Neuroendocrine Tumor |                                                   |
| Daratumumab                             | Janssen          | Multiple Myeloma     |                                                   |
| Pomalidomide                            | CTTQ             | Multiple Myeloma     |                                                   |
| Apalutamide                             | Janssen          | Prostate Cancer      |                                                   |
| Darolutamide                            | Bayer            | Prostate Cancer      |                                                   |
| Disitamab vedotin                       | RemeGen          | Gastric Cancer       |                                                   |

|              |  |       |                                                   |
|--------------|--|-------|---------------------------------------------------|
| Bendamustine |  | Tumor | Direct included generic with volume based pricing |
|--------------|--|-------|---------------------------------------------------|

\* indicates expanded in the renewal negotiation; ※ refers to Chinese Patent Medicine; ✓ means success in negotiation/re-negotiation

**Abbreviation:**

**AML:** acute myelogenous leukemia, **CLL:** chronic lymphocytic leukemia, **CMML:** chronic myelomonocytic leukemia, **CRC:** colorectal cancer,

**GEP-NET:** gastroenteropancreatic neuroendocrine tumor, **GIST:** gastrointestinal stromal tumors, **HCC:** hepatocellular carcinoma, **MCL:** Mantle Cell

Lymphoma, **MDS:** myelodysplastic syndromes, **NSCLC:** non-small cell lung cancer, **PET-MF:** post-essential thrombocythemia myelofibrosis, **PMF:**

primary myelofibrosis, **pNET:** Pancreatic neuroendocrine tumor, **PPV-MF:** post-polycythemia vera myelofibrosis, **RCC:** renal cell carcinoma, **rGBM:**

recurrent glioblastoma, **SLL:** small lymphocytic lymphoma, **TSC-AML:** Tuberous Sclerosis Complex-associated Angiomyolipoma
